# Supplementary material for: Genome-wide analysis of expansin superfamily in wild Arachis discloses a stress-responsive expansin-like B gene
Source: PubMed Central journal article supplement (PMC5437183; doi:10.1007/s11103-017-0594-8), 2017-02-27
Supplement: 11103_2017_594_MOESM2_ESM.pdf [file 11103_2017_594_MOESM2_ESM.pdf]

Genomic alignment visualization showing sequence conservation and quality across a region. The top section displays multiple sequence alignments with color-coded conservation levels. Below the alignments are tracks for Conservation (0.0 to 1.0) and Quality (0.0 to 1.0). The bottom section shows a Consensus sequence. The alignment includes various identifiers such as Phyl.001021000.11-207, Phyl.001022000.11-207, and Phyl.001023000.11-207, among others. The sequence is primarily composed of nucleotide bases (A, C, G, T) with some gaps represented by dashes.
