# Supplementary material for: Genome-wide analysis of expansin superfamily in wild Arachis discloses a stress-responsive expansin-like B gene
Source: PubMed Central journal article supplement (PMC5437183; doi:10.1007/s11103-017-0594-8), 2017-02-27

(a)

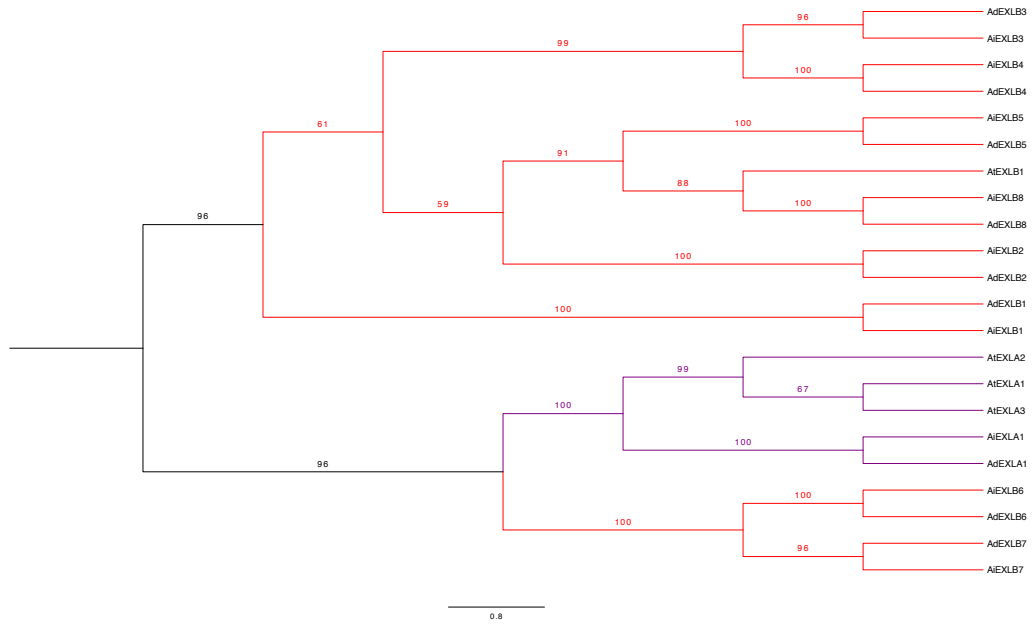

(b)

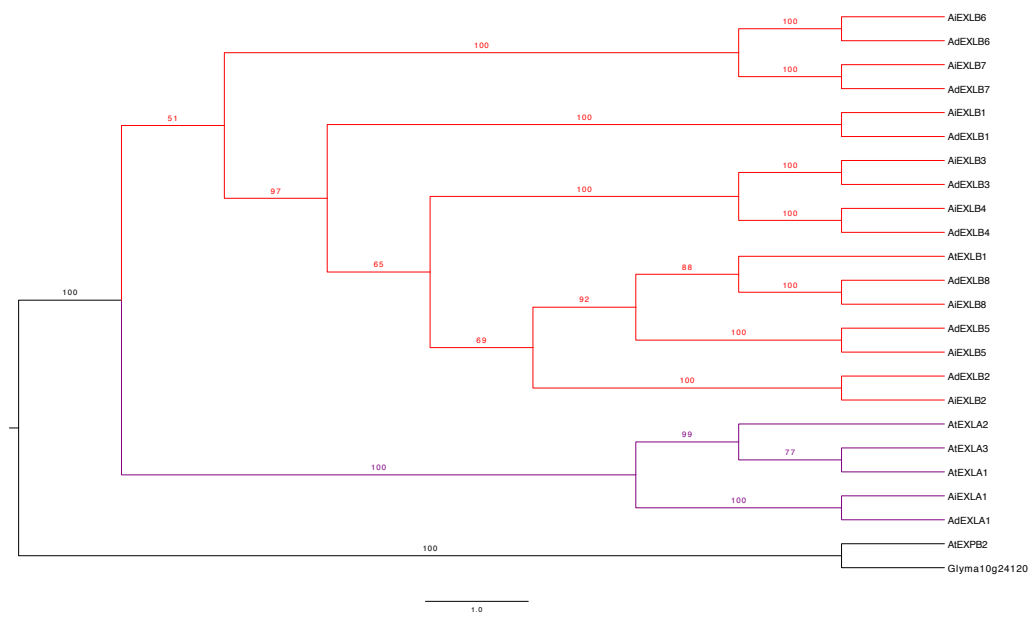

Supplement: 11103_2017_594_MOESM4_ESM.pdf [file 11103_2017_594_MOESM4_ESM.pdf]
